# Supplementary material
Source: publisher figshare collection journal article supplement (https://acs.figshare.com/ndownloader/files/26843619)
Supplement: Supplementary file 1 [file 26843619]

# The Synergistic Effect of Hydrogen and Strain on Electronic Properties of p-Cr<sub>2</sub>O<sub>3</sub>/n-Fe<sub>2</sub>O<sub>3</sub> Interface

Zhishan Mi,<sup>a,b</sup> Li Chen,<sup>\*a,c</sup> Hongmei Liu,<sup>c</sup> Changmin Shi,<sup>c</sup> Dongchao Wang,<sup>c</sup> Xiaolong Li,<sup>c</sup> Kefu Gao<sup>b,c</sup> and Lijie Qiao,<sup>\*\*b</sup>

<sup>a</sup> School of Electronic and Information Engineering (Department of Physics), Qilu University of Technology, Jinan, 250353, PR China

<sup>b</sup> Beijing Advanced Innovation Center for Materials Genome Engineering, Corrosion and Protection Center, University of Science and Technology Beijing, Beijing, 100083, PR China

<sup>c</sup> Institute of Condensed Matter Physics, Linyi University, Shandong, 276000, PR China

## Corresponding Authors

\*E-mail: chenli@lyu.edu.cn (L.C.).

\*\*E-mail: lqiao@ustb.edu.cn (L.Q.).

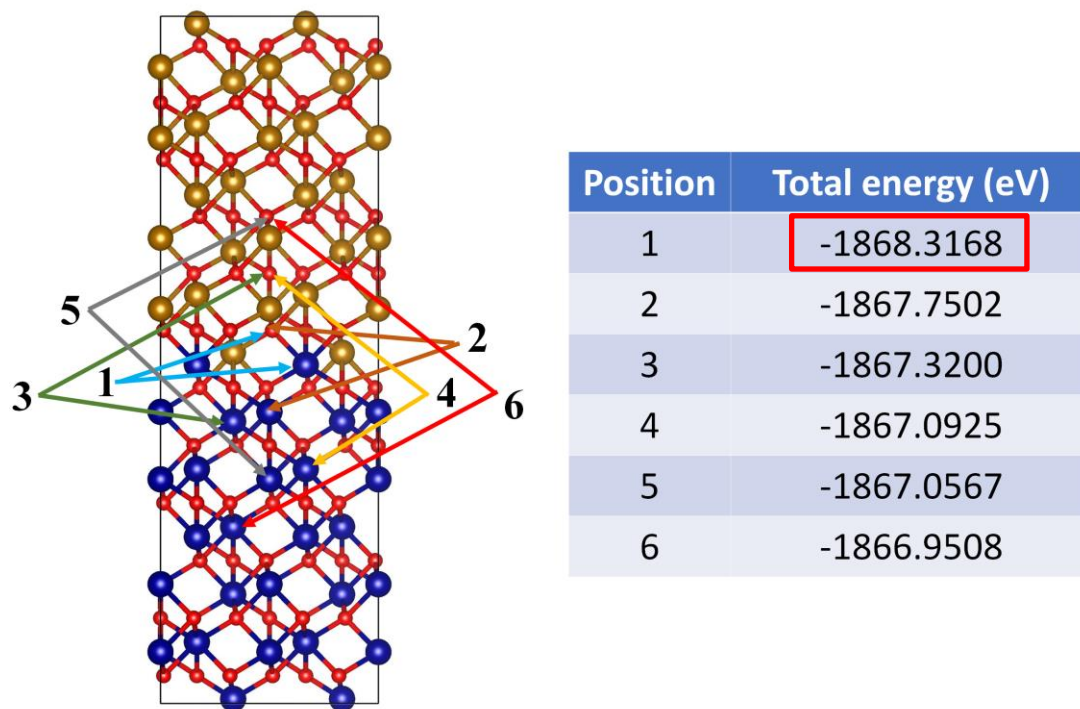

**Figure S1.** The Cr vacancy and O vacancy for interface structure in different position.

When the Cr vacancy and O vacancy are at the interface, the p-Cr<sub>2</sub>O<sub>3</sub>/n-Fe<sub>2</sub>O<sub>3</sub> interface structure is the most stable with the lowest total energy.

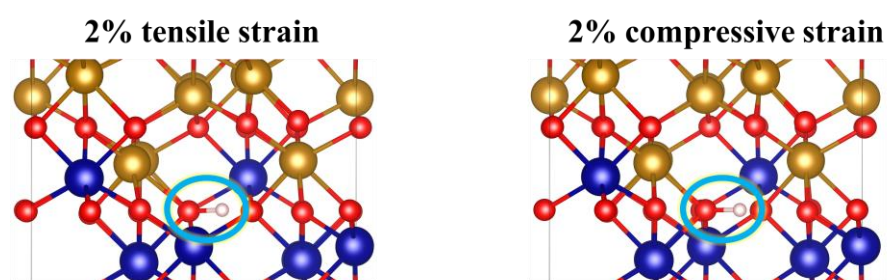

|                    | H-O bond | H charge tranfer |
|--------------------|----------|------------------|
| tensile strain     | 1.01 Å   | 0.70             |
| compressive strain | 1.03 Å   | 0.68             |

**Figure S2.** The structural analysis and H charge transfer under 2% tensile and compressive strain.
